# Supplementary material
Source: publisher figshare collection journal article supplement (https://tandf.figshare.com/ndownloader/files/13574759)
Supplement: Supplementary file 1 [file 13574759]

Fig.S1(A). Coats-Redfern Mample 1st order kinetics model studied in the range 300 – 400 oC; Plot of ln[β(g(α)/T2] *vs*. 1/T.

Fig.S1(B). Coats-Redfern Mample 1st order kinetics model studied in the range 25 – 50 oC; Plot of ln[β(g(α)/T2] *vs*. 1/T.

Fig.S2(A). Coats-Redfern diffusion model studied in the range 300 – 400 oC; Plot of ln[β(g(α)/T2] *vs*. 1/T.

Fig.S2(B). Coats-Redfern diffusion model studied in the range 25 – 50 oC; Plot of ln[β(g(α)/T2] *vs*. 1/T.
